# Supplementary material for: Densely grafted liquid crystalline copper phthalocyanine side chain polymer: synthesis and characterization
Source: Royal Society of Chemistry journal article supplement (doi:10.1039/c7tc01234a), 2017-01-01
Supplement: c7tc01234a1.pdf [file c7tc01234a1.pdf]

## Supporting Information

### Densely Grafted Liquid Crystalline Copper Phthalocyanine Side Chain Polymer: Synthesis and Characterization

C. David Heinrich<sup>a</sup>, Sinem Tuncel Kostakoğlu<sup>b</sup> and Mukundan Thelakkat<sup>a</sup>

<sup>a</sup> *Applied Functional Polymers, Macromolecular Chemistry I and Bavarian Polymer Institute, University of Bayreuth, Universitätsstr. 30, 95440 Bayreuth, Germany*

<sup>b</sup> *Department of Chemistry, Gebze Technical University, 41400 Gebze, Turkey*

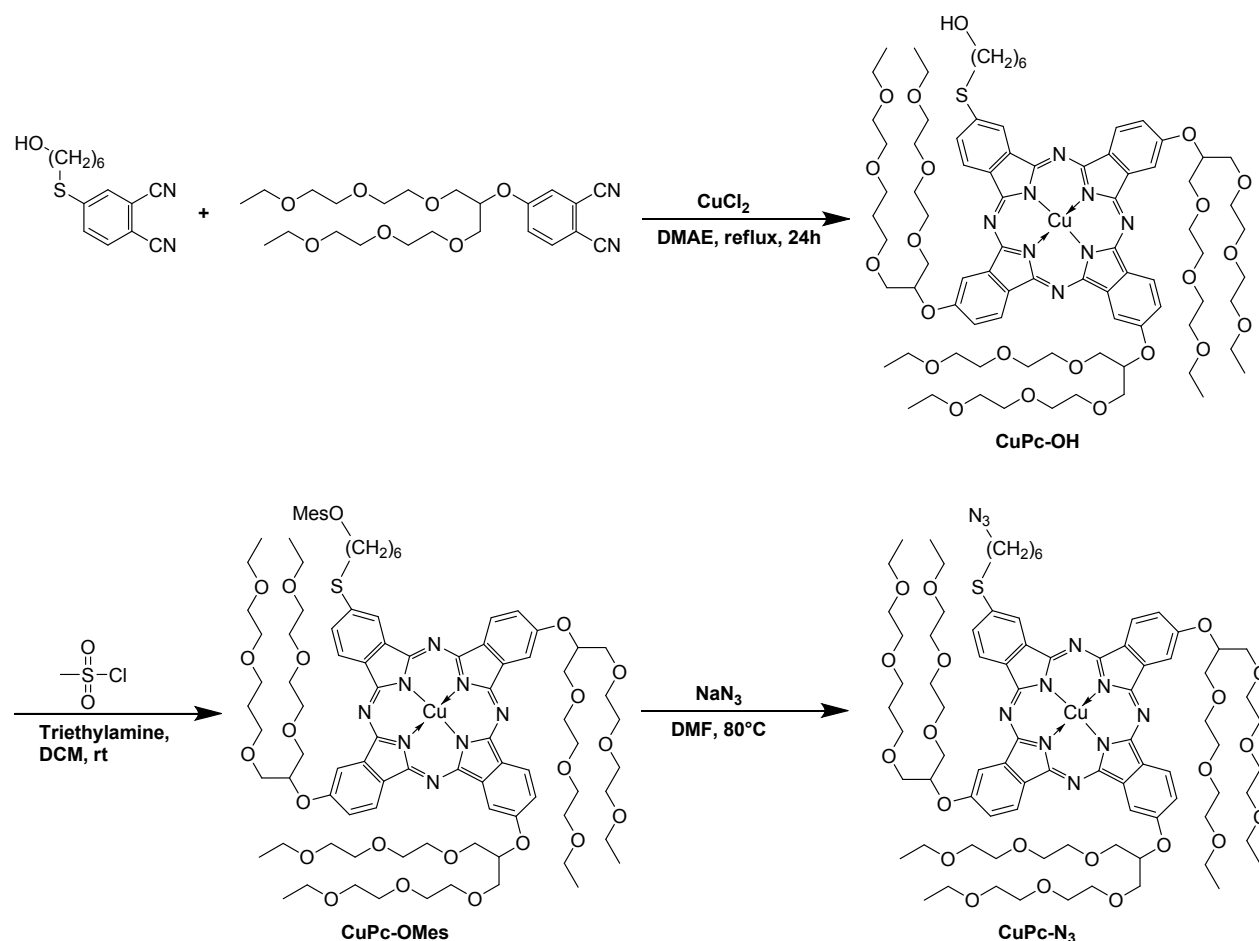

**Scheme S 1**      Synthesis of **CuPc-N<sub>3</sub>**.

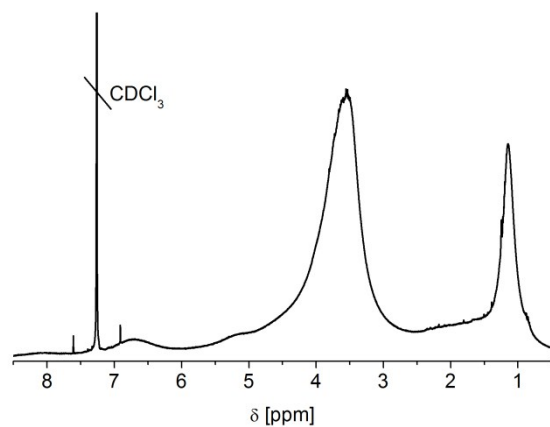

**Fig. S 1**  $^1\text{H}$ -NMR spectrum of **PCuPc**.

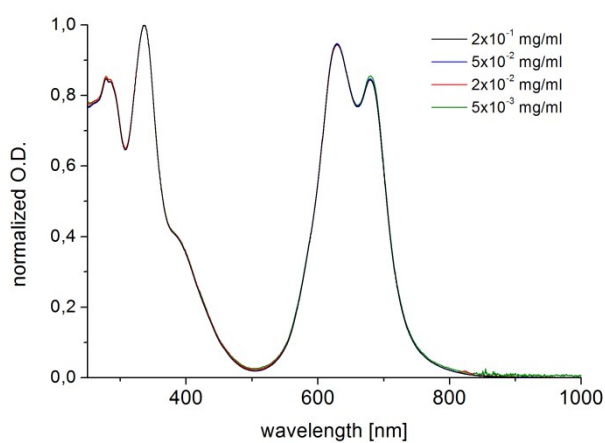

**Fig. S 2** Normalized UV-Vis spectra of solutions of **PCuPc** in DCM in a concentration range from  $2 \cdot 10^{-1}$ - $5 \cdot 10^{-3}$  mg mL $^{-1}$ . No difference of the spectra at different concentrations can be detected.

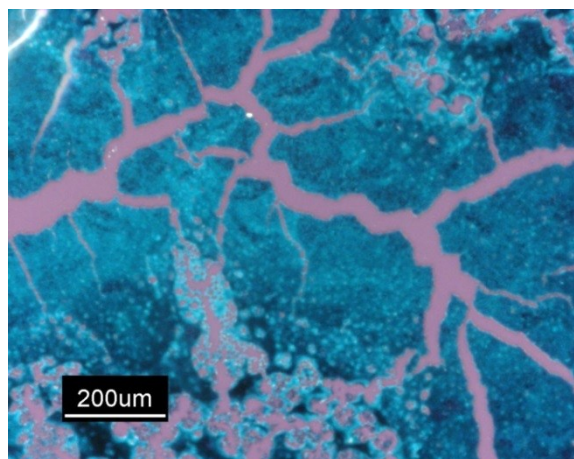

**Fig. S 3** Polarization microscopy picture of **PCuPc** at room temperature.

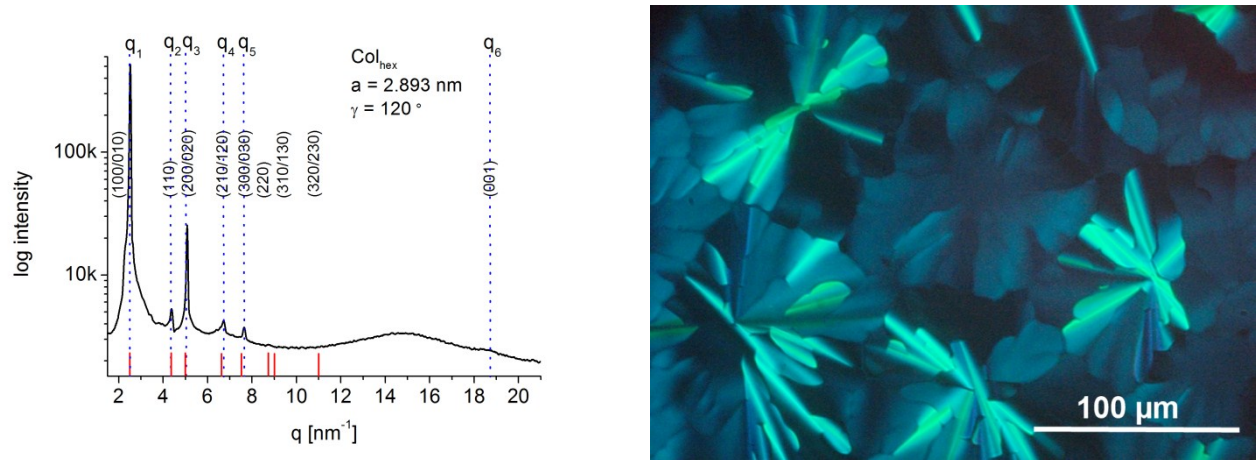

**Fig. S 4** (left) Diffraction pattern of the hexagonal mesophase ( $\text{Col}_{\text{hex}}$ ) of **CuPc-OH** measured at room temperature with the calculated reflection positions indicated by the red bars (measured at a Bruker Advanced D8 diffractometer). (right) Polarization microscopy picture of **CuPc-OH** at room temperature. The phase transition behavior of CuPc-OH was observed by means of a polarizing optical microscope (Leitz Wetzler Orthoplan-pol.) equipped with a hot stage (Linkam TMS 93) and a temperature controller (Linkam LNP).

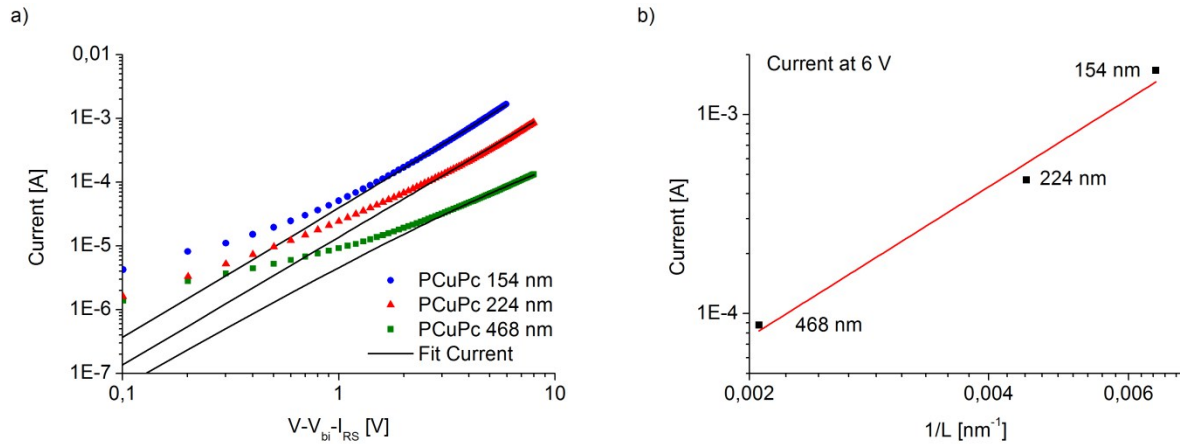

**Fig. S 5** a) Log-log plot of I-V characteristics of as-cast films of **PCuPc** measured at room temperature. The I-V characteristics were corrected for the built-in voltage ( $V_{\text{bi}}$ ) and the voltage drop ( $IR$ ) over the contacts. The fits are calculated with equation (5) and the parameters given in **Table S 1**. b) Dependency of the current at a fixed voltage (6 V) on the film thickness  $L$ . The fit corresponds to  $L^3$ .

**Table S 1** Active layer film thicknesses and fitting parameter for the SCLC devices.

|          | Thickness<br>[nm] | Fitted mobility<br>[ $\text{cm}^2 \text{V}^{-1} \text{s}^{-1}$ ] | Fitted $\gamma$<br>[ $\text{V}^{-0.5} \text{m}^{-0.5}$ ] | Mobility at $F = 1.5 \cdot 10^7 \text{ V m}^{-1}$<br>[ $\text{cm}^2 \text{V}^{-1} \text{s}^{-1}$ ] |
|----------|-------------------|------------------------------------------------------------------|----------------------------------------------------------|----------------------------------------------------------------------------------------------------|
| Device 1 | 154               | $4.1 \cdot 10^{-5}$                                              | $-4.7 \cdot 10^{-5}$                                     | $4.9 \cdot 10^{-6}$                                                                                |
| Device 2 | 224               | $5.0 \cdot 10^{-6}$                                              | 0                                                        | $5.0 \cdot 10^{-6}$                                                                                |
| Device 3 | 468               | $2.3 \cdot 10^{-5}$                                              | $-3.4 \cdot 10^{-4}$                                     | $6.2 \cdot 10^{-6}$                                                                                |
